# Supplementary material for: Nitrogen and phosphorus modification to enhance the catalytic activity of biomass-derived carbon toward the oxygen reduction reaction
Source: Royal Society of Chemistry journal article supplement (doi:10.1039/c9se00985j), 2019-11-28
Supplement: c9se00985j1.pdf [file c9se00985j1.pdf]

# Electronic Supplementary Information (ESI) for: Nitrogen and Phosphorus Modification to Enhance the Catalytic Activity of Biomass-Derived Carbon toward Oxygen Reduction Reaction

Lei Han,<sup>a</sup> Xingyu Cui,<sup>a</sup> Yanyan Liu,<sup>b\*</sup> Guosheng Han,<sup>a</sup> Xianli Wu,<sup>a\*</sup> Chunbao (Charles) Xu,<sup>c, d</sup> and Baojun Li<sup>a</sup>

<sup>a</sup> Research Center of Green Catalysis, College of Chemistry, Zhengzhou University, 100 Science Road, Zhengzhou 450001, P. R. China

<sup>b</sup> Institute of Chemical Industry of Forest Products, CAF; National Engineering Lab. for Biomass Chemical Utilization; Key Lab. of Chemical Engineering of Forest Products, National Forestry and Grassland Administration; Key Lab. of Biomass Energy and Material, Jiangsu Province; Co-Innovation Center of Efficient Processing and Utilization of Forest Resources, Nanjing 210042, P. R. China

<sup>c</sup> College of Chemical Engineering, Zhengzhou University, 100 Science Road, Zhengzhou 450001, P. R. China

<sup>d</sup> Department of Chemical & Biochemical Engineering, Western University, London, Ontario, Canada

\* Corresponding Author. E-mail: lyyllhs180208@163.com (Y.Y. Liu), and wuxianli@zzu.edu.cn (X. L. Wu)

**Total number of pages: 10**

**Total number of figures: 12**

**Total number of table: 2**

## Table of Contents

|                 |     |
|-----------------|-----|
| Figure S1.....  | S2  |
| Figure S2.....  | S2  |
| Figure S3.....  | S3  |
| Figure S4.....  | S3  |
| Figure S5.....  | S4  |
| Figure S6.....  | S4  |
| Figure S7.....  | S4  |
| Figure S8.....  | S5  |
| Figure S9.....  | S6  |
| Figure S10..... | S6  |
| Figure S11..... | S6  |
| Figure S12..... | S7  |
| Table S1 .....  | S5  |
| Table S2 .....  | S8  |
| References..... | S10 |

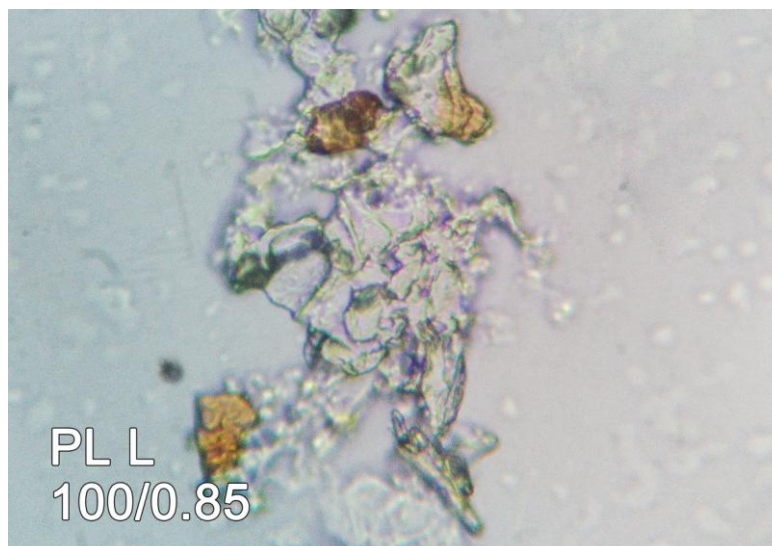

**Figure S1.** Optical microscope image of Fructus azedarach.

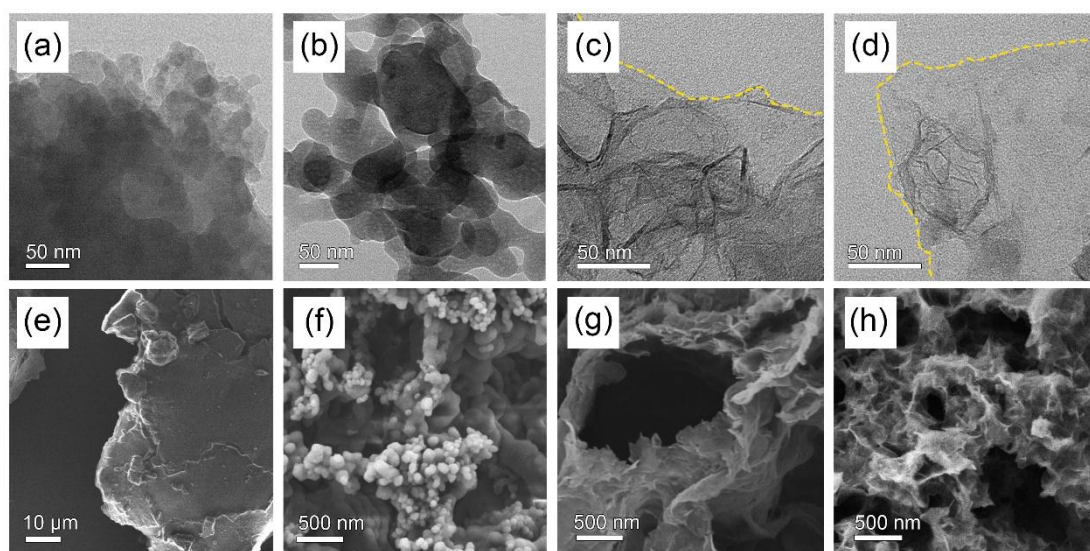

**Figure S2.** (a) TEM image of Fructus azedarach, (b) TEM image of PTC, (c) TEM image of KAC, (d) TEM image of NPDC-1.09, (e) SEM image of Fructus azedarach, (f) SEM image of PTC, (g) SEM image of KAC, and (h) SEM image of NPDC-1.09.

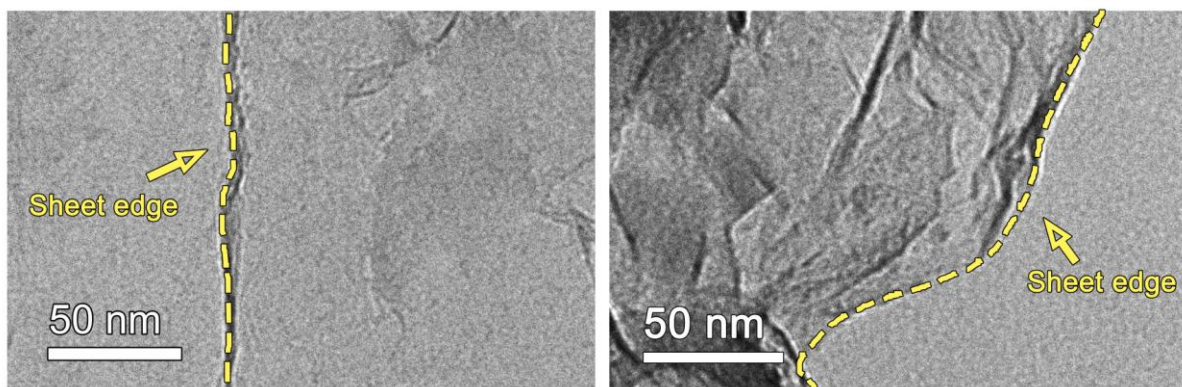

**Figure S3.** (a) TEM image of NPDC-1.09, (b) TEM image of hydrothermally treated NPDC (NPDC-H).

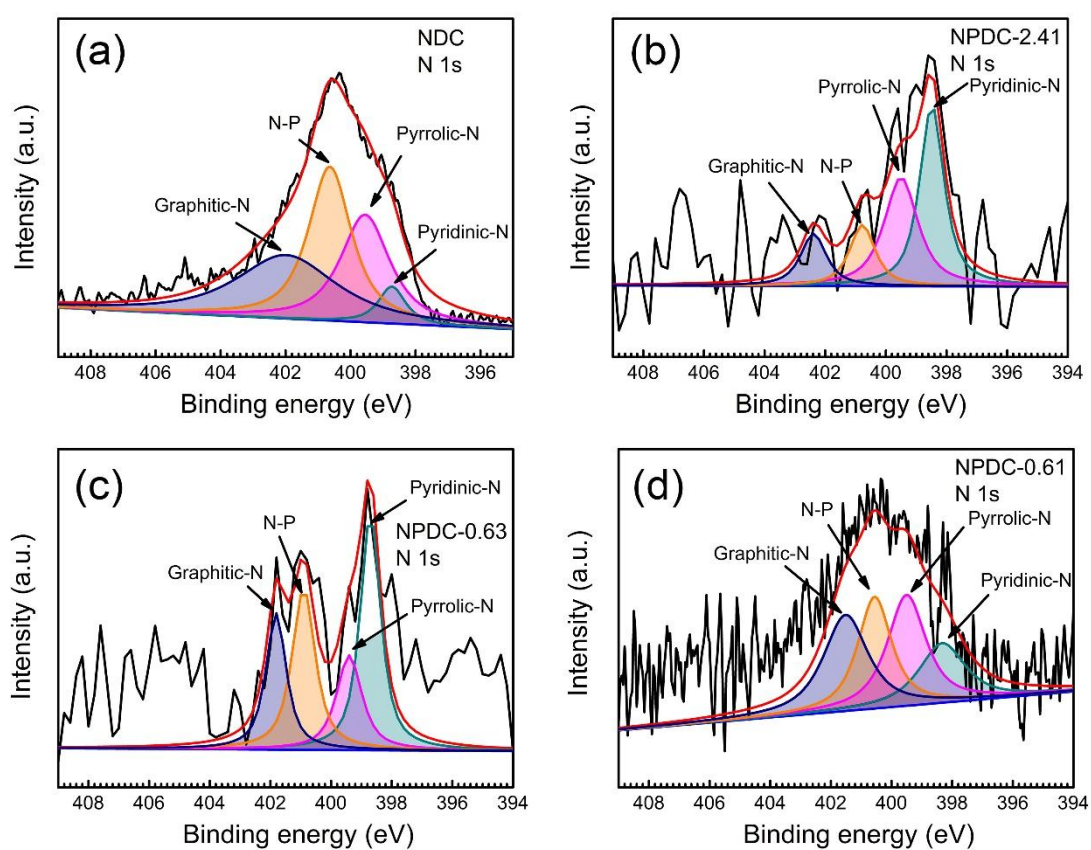

**Figure S4.** High resolution XPS spectra of N 1s in (a) NDC, (b) NPDC-2.41, (c) NPDC-0.63, and (d) NPDC-0.61.

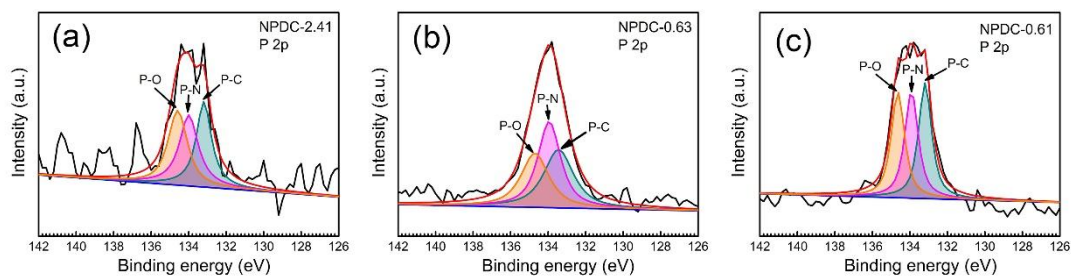

**Figure S5.** High resolution XPS spectra of P 2p in (a) NPDC-2.4, (b) NPDC-0.63, and (c) NPDC-0.61.

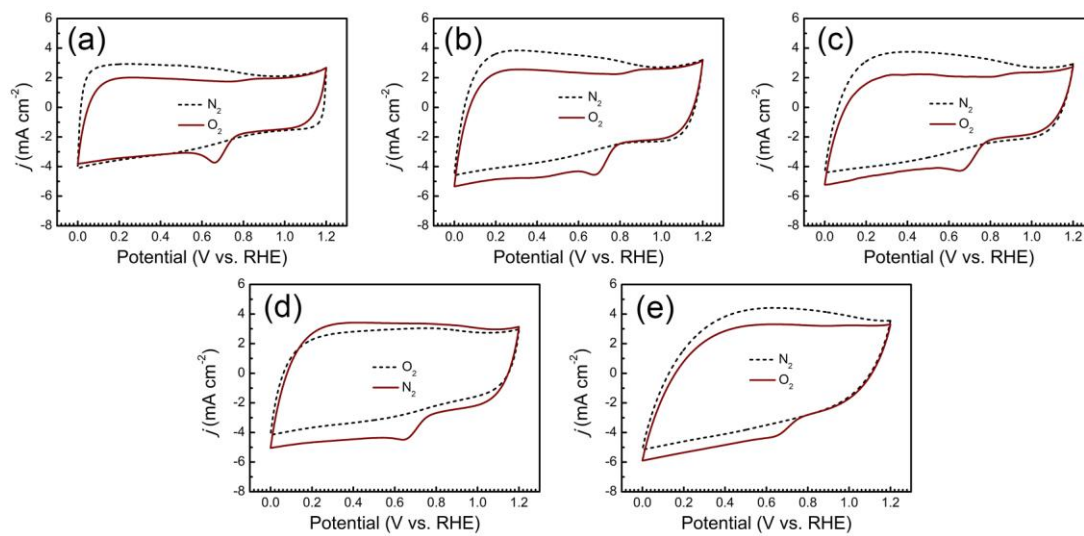

**Figure S6.** CV curve in (a) NDC, (b) NPDC-0.61, (c) NPDC-0.63, (d) NPDC-2.41, (e) NPDC-H.

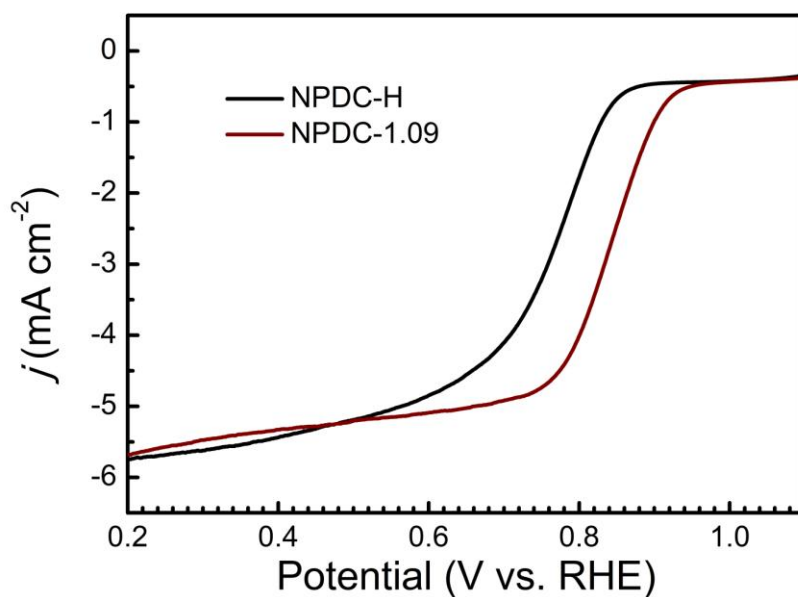

**Figure S7.** LSV curve of NPDC-H and NPDC-1.09.

**Table S1.** N 1s and P 2p fitted results of all sample.

| Samples        | Nitrogen (%) |          |       |          | Phosphorous (%) |       |       |
|----------------|--------------|----------|-------|----------|-----------------|-------|-------|
|                | Pyridine     | Pyrrolic | N-P   | Graphite | P-O             | P-N   | P-C   |
| KAC            | 12.25        | 55.63    | --    | 32.12    | --              | --    | --    |
| NDC            | 5.21         | 27.45    | 34.38 | 32.96    | --              | --    | --    |
| NPDC-2.41      | 39.86        | 33.69    | 14.24 | 12.21    | 34.13           | 32.17 | 32.89 |
| NPDC-1.09      | 44.83        | 22.03    | 14.57 | 18.57    | 25.52           | 32.14 | 42.34 |
| NPDC-1.09 (ar) | 14.52        | 26.20    | 27.76 | 31.52    | 26.54           | 37.91 | 35.55 |
| NPDC-0.63      | 52.17        | 14.50    | 20.29 | 13.04    | 34.23           | 38.30 | 27.47 |
| NPDC-0.61      | 20.28        | 28.32    | 21.11 | 30.29    | 34.24           | 33.93 | 31.83 |

\*PS: (ar) means after reaction.

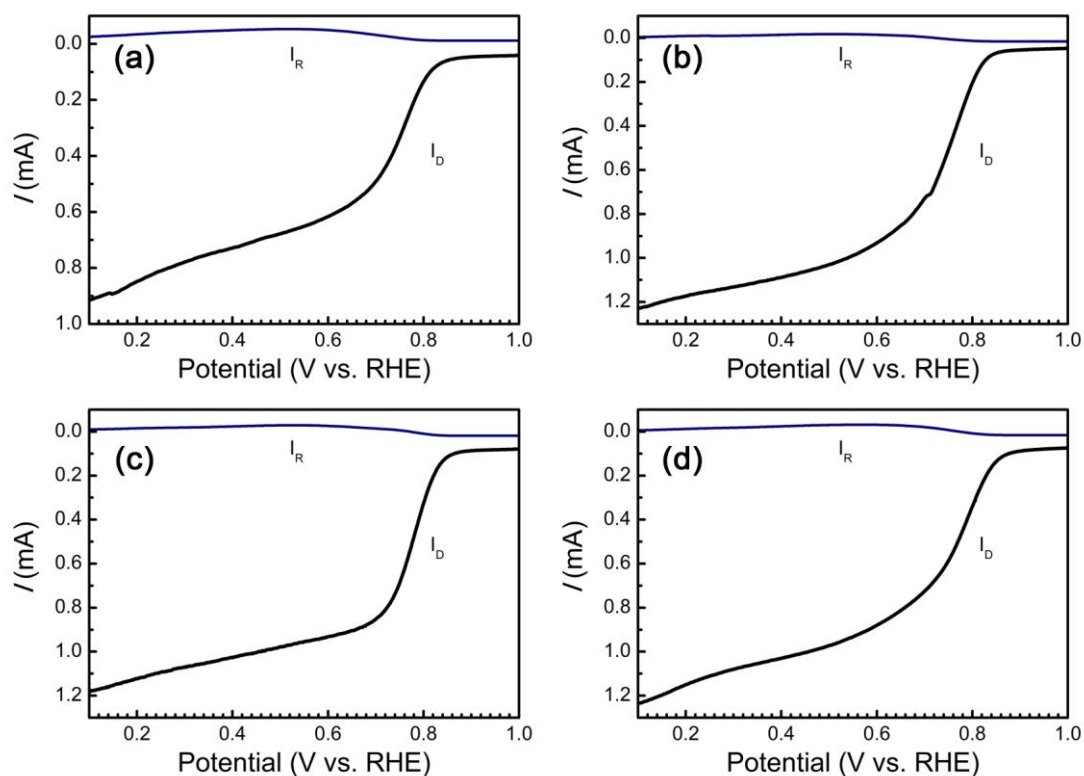**Figure S8.** (a) Disk and ring currents of NDC, (b) Disk and ring currents of NPDC-0.61, (c) Disk and ring currents of NPDC-0.63, (d) Disk and ring currents of NPDC-2.41.



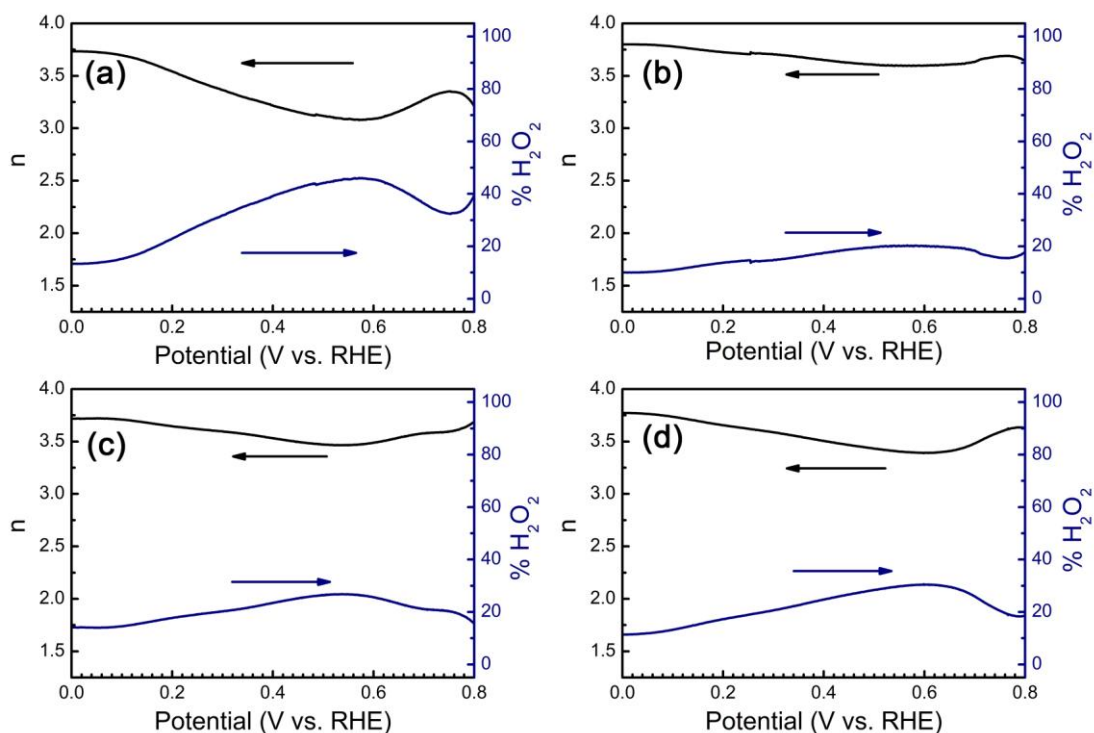

**Figure S9.** (a-d) Calculated  $n$  and determined %  $\text{H}_2\text{O}_2$  at various potentials of NDC, NPDC-0.61, NPDC-0.63 and NPDC-2.41.

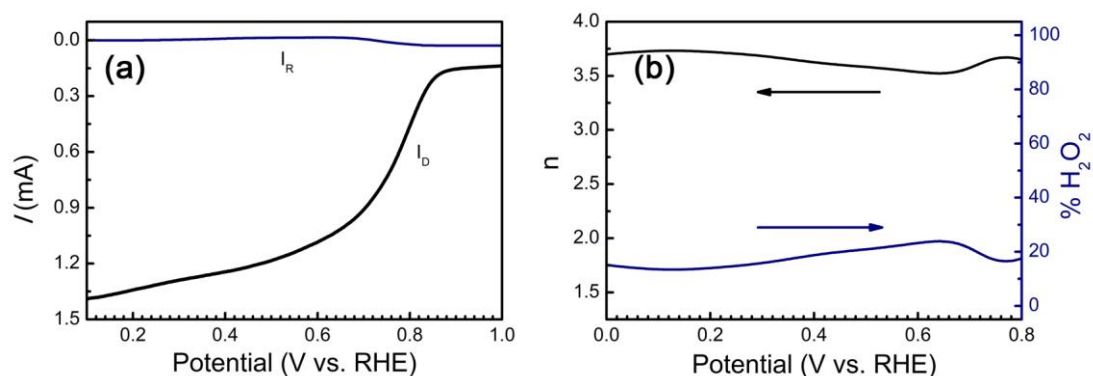

**Figure S10.** (a) Disk and ring currents of NPDC-H, (b) Calculated  $n$  and determined %  $\text{H}_2\text{O}_2$  of NPDC-H.

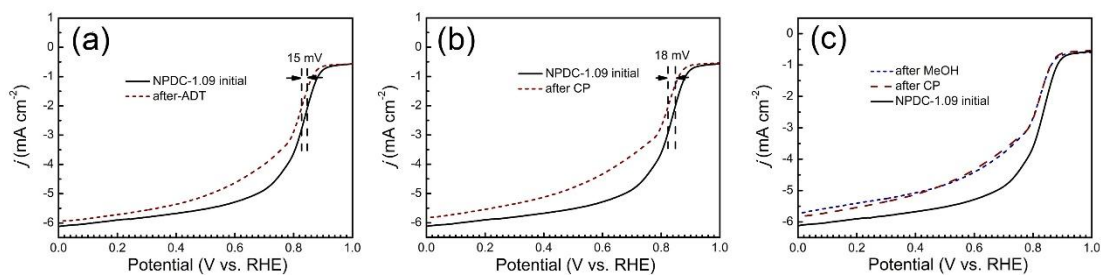

**Figure S11.** (a) LSV diagram of NPDC-1.09 after ADT test, (b) LSV diagram of NPDC-1.09 after CP test, and (c) LSV diagram of NPDC-1.09 after adding MeOH.

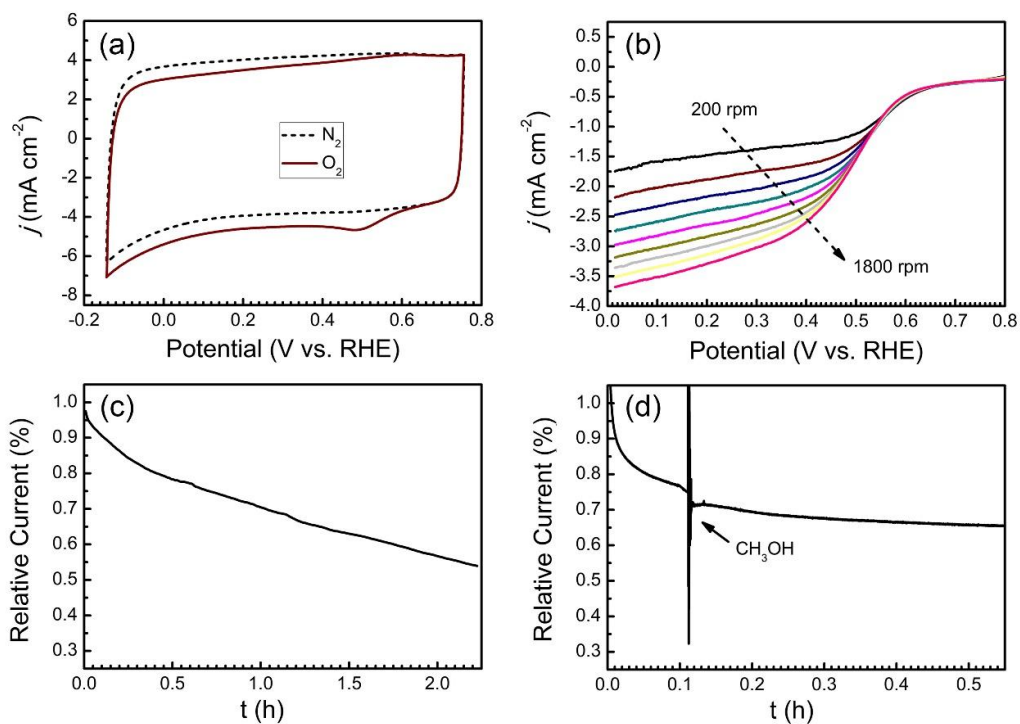

**Figure S12.** (a) CV curves NPDC-1.09 in 0.1 M HClO<sub>4</sub>, (b) LSV curves of NPDC-1.09 with rotate speed of 200 rpm-1800 rpm in 0.1 M HClO<sub>4</sub>; (c) the CP curve on NPDC-1.09 in 0.1 M HClO<sub>4</sub>, and (d) the CP curve on NPDC-1.09 with addition of MeOH in 0.1 M HClO<sub>4</sub>.

**Table S2.** The performance of the sample NPDC-1.09 in this work is compared with the samples in other papers.

| Biomass source          | Heteroatom precursor           | Other precursors                                                | Synthesis strategy        | Surface area [m <sup>2</sup> g <sup>-1</sup> ] | $E_{\text{onset}}$ [V] | $E_{1/2}$ [V] | $E_{\text{OER}}$ [V] | Transferred electrons ( $n$ ) | Zn-air battery cycle duration [h] | Ref. |
|-------------------------|--------------------------------|-----------------------------------------------------------------|---------------------------|------------------------------------------------|------------------------|---------------|----------------------|-------------------------------|-----------------------------------|------|
| Sodium alginate         | 2-methylimidazole (N)          | Co(NO <sub>3</sub> ) <sub>2</sub><br>NaHCO <sub>3</sub>         | Activation,<br>MOF growth | 252                                            | 0.90                   | 0.83          | –                    | 4.3                           | –                                 | S1   |
| Peanut-shell            | Dopamine (N)                   | Co(AC) <sub>2</sub><br>Fe(NO <sub>3</sub> ) <sub>3</sub><br>KOH | Activation,<br>Pyrolysis  | 1863                                           | 1.05                   | 0.84          | 1.61                 | 4.8                           | 155                               | S2   |
| D-Glucose and Cellulose | Soya bean flour (N)            | –                                                               | Pyrolysis<br>Hydrothermal | 449                                            | 0.90                   | 0.76          | –                    | 3.8                           | –                                 | S3   |
| Hair                    | Self-doping (N, S)             | KOH                                                             | Pyrolysis,<br>Activation  | 1698                                           | 0.92                   | 0.82          | –                    | 3.9                           | –                                 | S4   |
| Coconut shell           | Urea (N)<br>Phosphate acid (P) | –                                                               | Activation,<br>Pyrolysis  | 1216                                           | 0.94                   | 0.75          | –                    | 3.7                           | –                                 | S5   |
| Triarrhena              | Melamine                       | KOH                                                             | Pyrolysis<br>Hydrothermal | 1347                                           | 0.94                   | 0.83          | –                    | 3.8                           | –                                 | S6   |
| Pristine catkin         | NH <sub>3</sub> (N)            | [Omim]FeCl <sub>4</sub>                                         | Pyrolysis                 | 385                                            | 0.93                   | 0.85          | 1.54                 | 4                             | –                                 | S7   |



|                      |                                                                        |                                   |                                          |      |      |      |      |     |      |              |
|----------------------|------------------------------------------------------------------------|-----------------------------------|------------------------------------------|------|------|------|------|-----|------|--------------|
| Wood                 | NH <sub>4</sub> Cl (N)                                                 | –                                 | Pyrolysis<br>Cellulose<br>Activation     | 1039 | 0.99 | 0.83 | 1.61 | 3.9 | 80   | S8           |
| Peach gum            | Melamine (N)                                                           | Co(NO <sub>3</sub> ) <sub>2</sub> | Pyrolysis                                | -    | 0.91 | 0.81 | 1.63 | 3.9 | 32   | S9           |
| Porphyra             | Self-doping (N, S)                                                     | FeCl <sub>3</sub>                 | Encapsulate,<br>Pyrolysis                | 1533 | 0.96 | 0.84 | 1.62 | 3.8 | 66.5 | S10          |
| Fructus<br>azedarach | NH <sub>4</sub> H <sub>2</sub> PO <sub>4</sub> (N, P)<br>Cyanamide (N) | KHCO <sub>3</sub>                 | Pyrolysis,<br>Activation<br>Hydrothermal | 1584 | 0.94 | 0.84 | 1.68 | 3.9 | 84   | This<br>work |

---

## REFERENCES

- S1. J. H. Shu, Q. J. Niu, N. N. Wang, J. Niu, G. P. Ma, Alginate derived Co/N doped hierarchical porous carbon microspheres for efficient oxygen reduction reaction. *Appl. Surf. Sci.*, 2018, **485**, 520–528. DOI: 10.1016/j.apsusc.2019.04.204
- S2. J. J. Liu, T. He, Q. C. Wang, Z. X. Zhou, Y. Q. Zhang, H. Q. Wu, Q. Li, J. Zheng, Z. F. Sun, Y. P. Lei, J. M. Ma, Y. Zhang, Confining ultrasmall bimetal alloys in porous N-carbon as scalable and sustainable electrocatalysts for rechargeable Zn–air batteries. *J. Mater. Chem. A*, 2019, **7**, 12451–12456. DOI: 10.1039/C9TA02264C
- S3. S. M. Alatalo, K. P. Qiu, K. Preuss, A. Marinovic, M. Sevilla, M. Sillanpaa, X. Guo, M. M. Titirici, Soy protein directed hydrothermal synthesis of porous carbon aerogels for electrocatalytic oxygen reduction. *Carbon*, 2015, **96**, 622–630. DOI: 10.1016/j.carbon.2015.09.108
- S4. K. N. Chaudhari, M. Y. Song, J. S. Yu, Transforming hair into heteroatom-doped carbon with high surface area. *Small*, 2014, **12**, 2625–2636. DOI: 10.1002/smll.201303831
- S5. M. Boighei, N. Laocharoen,; E. Kibena-Poldsepp, L. Johansson, Porous N,P-doped carbon from coconut shells with high electrocatalytic activity for oxygen reduction: Alternative to Pt-C for alkaline fuel cells. *Appl. Catal. B*, 2017, **204**, 394–402. DOI: 10.1016/j.apcatb.2016.11.029
- S6. P. P. Chen, J. B. Zang, S. Y. Zhou, S. P. Jia, P. F. Tian, H. X. Cai, H. W. Gao, Y. H. Wang, N-doped 3D porous carbon catalyst derived from biowaste *Triarrhena sacchariflora* panicle for oxygen reduction reaction. *Carbon*, 2019, **146**, 70–77. DOI: 10.1016/j.carbon.2019.01.106
- S7. G. P. Liu, B. Wang, P. H. Ding, Y. Z. Ye, W. X. Wei, W. S. Zhu, L. Xu, J. X. Xia, H. M. Li, Reactable ionic liquid in situ-induced synthesis of Fe<sub>3</sub>O<sub>4</sub> nanoparticles modified N-doped hollow porous carbon microtubes for boosting multifunctional electrocatalytic activity. *J. Alloys Compd.*, 2019, **797**, 849–858. DOI: 10.1016/j.jallcom.2019.04.284
- S8. X. W. Peng, L. Zhang, Z. X. Chen, L. X. Zhong, D. K. Zhao, X. Chia, X. W. Zhao, L. G. Li, X. H. Lu, K. Leng, C. B. Liu, W. Liu, W. Tang, K. P. Loh, Hierachically porous carbon plates derived from wood as bifunctional ORR/OER electrodes. *Adv. Mater.*, 2019, **07**, 1900341–1900348. DOI: 10.1002/adma.201900341
- S9. Y. H. Tian, L. Xu, J. Bao, J. C. Qian, H. N. Su, H. M. Li, H. D. Gu, C. Yan, H. N. Li, Hollow cobalt oxide nanoparticles embedded in nitrogen-doped carbon nanosheets as an efficient bifunctional catalyst for Zn-air battery. *J. Energ. Chem.*, 2019, **33**, 59–66. DOI: 10.1016/j.jechem.2018.08.007
- S10. J. T. Zhang, M. Zhang, Y. Zeng, J. S. Chen, Li. X. Qiu, H. Zhou, C. J. Sun, Y. Yu, C. Z. Zhu, Z. H. Zhu, Single Fe atom on hierarchically porous S, N-codoped nanocarbon derived from porphyrin enable boosted oxygen catalysis for rechargeable Zn-air batteries. *Small*, 2019, **15**, 1900307–1900318. DOI: 10.1002/smll.201900307
